# Supplementary material for: Control of n-Butanol Induced Lipidome Adaptations in E. coli
Source: MDPI journal article supplement (doi:10.3390/metabo11050286), 2021-04-29
Supplement: s1 [file s1]

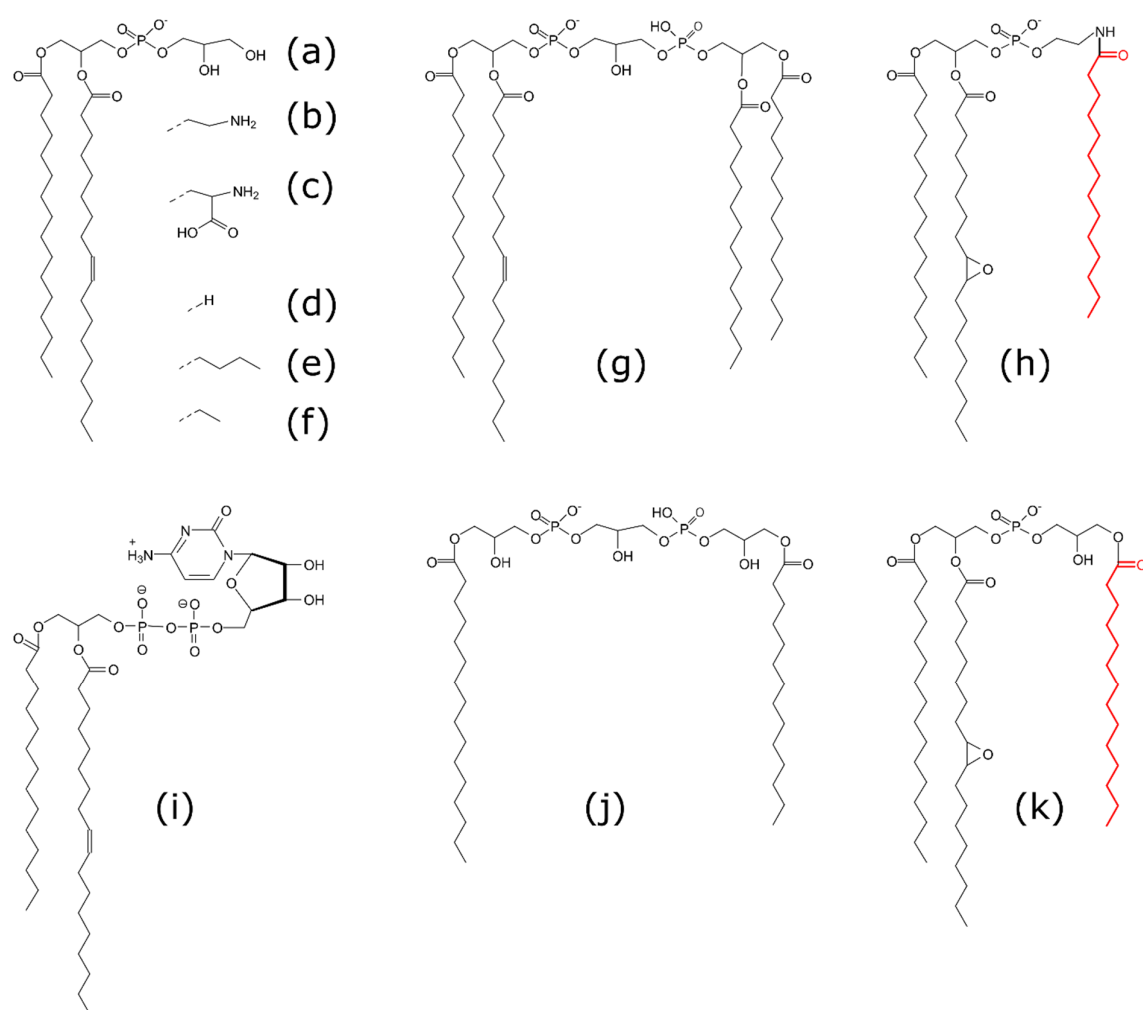

**Figure S1** Structures of lipid classes described in this paper. All lipids are depicted as deprotonated molecules. High resolution accurate mass fragmentation spectra have been published previously (e.g. <https://doi.org/10.1016/j.celrep.2019.04.018>). (a) PG; (b) PE; (c) PS; (d) PA; (e) PBut; (f) Peth; (g) CL; (h) aPE; (i) CDP-DAG; (j) DLCL; (k) aPG. Headgroup acylations are depicted in red. Note the cyclopropane moieties in (h) and (k).
